# Supplementary material
Source: PubMed Central journal article supplement (PMC3959770)
Supplement: NIHMS548384-supplement-Supporting_Information.pdf [file NIHMS548384-supplement-Supporting_Information.pdf]

## Supp. Methods S1. Next-Generation Sequencing Methods and Annotation Notes

Solution hybridization exome capture was carried out using the SureSelect Human All Exon 50Mb Kit (Agilent Technologies, Santa Clara, CA). This technique uses biotinylated RNA baits to hybridize to sequences that correspond to exons(1). Manufacturer's protocol version 1.0 compatible with Illumina paired end sequencing was used, with the exception that DNA fragment size and quality was measured using a 2% agarose gel stained with Sybr Gold instead of using an Agilent Bioanalyzer. Additionally, the Illumina library preparation portion of the Sure-Select protocol was performed using the SPRIworks Fragment Library System (Beckman Coulter Genomics, Danvers, MA, USA) according to manufacturer's protocols. Agilent's specifications state that the capture regions total approximately 38 Mb. This kit covers the 1.22% of the human genome corresponding to the Consensus Conserved Domain Sequences database (CCDS) and greater than 1000 non coding RNAs. The 50Mb kit also includes exons defined by the Gencode Project (<http://www.sanger.ac.uk/resources/databases/encode/>). Flowcell preparation and 76 or 101bp paired end read sequencing were carried out as per protocol for the GAIIx sequencer (2) (Illumina Inc, San Diego CA). Image analysis and base calling on all lanes of data were performed using Illumina Genome Analyzer Pipeline software (GAPipeline versions 1.4.0 or greater) with default parameters.

### Read mapping, variant calling and annotation

Reads were aligned to a human reference sequence (UCSC assembly hg18, NCBI build 36) using the package called "efficient large-scale alignment of nucleotide databases" (ELAND). Reads that align uniquely were grouped into genomic sequence intervals of about 100kb, and reads that fail to align were binned with their paired-end mates. Reads in each bin were subjected to a Smith-Waterman-based local alignment algorithm, *cross\_match* using the parameters `-minscore 21` and `-masklevel 0` to their respective 100kb genomic sequence (<http://www.phrap.org>). Genotypes were called at all positions where there were high-quality sequence bases (Phred-like Q20 or greater) using a Bayesian algorithm (Most Probable Genotype – MPG; Nancy F Hansen, (3) ). Genotypes with a MPG score of 10 or greater show >99.89% concordance with SNP Chip data. The targeted regions included the exons of 17,134 genes and total 36,025,890 bases in the human genome.[All exon 38Mb] The targeted regions included exons of 30,241 genes and total 51,499,639 bases in the human genome. [All Exon 50Mb]. Our annotation of cSNVs (coding single nucleotide variants) was based on UCSC all known genes. Missense variants were sorted by the degree of severity of functional disruption prediction using CDPred(4). Variants detected in dbSNP (version 130) were excluded from being potential disease causing cSNVs.

- 1) Gnirke, A. et al. Solution hybrid selection with ultra-long oligonucleotides for massively parallel targeted sequencing. *Nat Biotechnol* 27, 182-9 (2009).
- 2) Bentley, D.R. et al. Accurate whole human genome sequencing using reversible terminator chemistry. *Nature* 456, 53-9 (2008).
- 3) Systematic comparison of three genomic enrichment methods for massively parallel DNA sequencing. Teer JK, Bonnycastle LL, Chines PS, Hansen NF, Aoyama N, Swift AJ, Abaan HO, Albert TJ; NISC Comparative Sequencing Program, Margulies EH,

Green ED, Collins FS, Mullikin JC, Biesecker LG. *Genome Res.* 2010 Oct;20(10):1420-31. Epub 2010 Sep 1.

- 4) Massively parallel sequencing of exons on the X chromosome identifies RBM10 as the gene that causes a syndromic form of cleft palate. Johnston JJ, Teer JK, Cherukuri PF, Hansen NF, Loftus SK; NIH Intramural Sequencing Center, Chong K, Mullikin JC, Biesecker LG. *Am J Hum Genet.* 2010 May 14;86(5):743-8. Epub 2010 May 6.

## Supp. Methods S2. Variant List Structure and the VarSifter File

The VarSifter data file (\*.vs file) is a tab-delimited text file. The first row is a series of headers that label the contents of each column. All rows after the first row are individual variants, which may be substitutions, insertions/deletions, etc. A full explanation of the file structure can be found at the VarSifter website:

<http://research.nhgri.nih.gov/software/VarSifter/guide.shtml>

The easiest way for a new user to become familiar with the VarSifter format is to open up a small VarSifter file from the provided example file, for example

`compexome_37a_homozygous_recessive.vs`

with a spreadsheet program like Microsoft Excel. The VarSifter format is a specific example of a more general NextGen-sequencing file type, the “variant list”. The fundamental components of a variant list form a “basic variant list” that includes the following information for each variant:

1. The Chromosome number.
2. Position in the chromosome.
  - The position is based on a published reference sequence, e.g. the National Center for Biotechnology Information (NCBI) human genome reference sequence, build 36 or “NCBI hg18 build 36”.
  - The position in Varsifter is the left side (towards smaller number in the reference sequence for the given chromosome) flanking base and the right side flanking base. Other means for specifying positions may be used.
3. The original nucleotide(s) or structure found at the position (again based on a reference sequence).
4. The new nucleotide(s) or structure found at the position.

All of the other information in the variant list is added after the genotypes have been done. Common added data (and VarSifter examples include:

1. Gene context (in VarSifter the Gene\_name, strand, ref\_aa, var\_aa, etc).
  - Gene context refers to a specific RNA transcript, which is usually the most common if that information is known.
2. Genotype Quality (in VarSifter the \*.score and \*.coverage columns).
3. A pathogenicity prediction (in VarSifter the CDPred\_score).
  - Many different programs, including PolyPhen and SIFT, can be used to generate scores and different programs produce different types of output.

Other data may include dbSNP allele frequencies and links to the UCSC genome browser or other databases. A basic variant list can be annotated using web-based tools designed specifically for this purpose. Examples include:

1. ANNOVAR (<http://www.openbioinformatics.org/annovar/>).
2. SeattleSeq (<http://gvs.gs.washington.edu/SeattleSeqAnnotation/>).

At our site, the VarSifter file contains genotypes for each member of family submitted for exome sequencing (FATHER.NA.\*, MOTHER.NA.\*, etc). This type of annotation is generally not available at public annotation sites but may be added by custom scripting or incorporated into analysis at later steps in programs such as VAR-MD (soon to be made available) and VAAST

<http://www.yandell-lab.org/software/vaast.html>).

Readers who would like to manipulate a small VarSifter file to get a feel for the VarSifter program are encouraged to try a partially filtered from the Incremental Filtered VarSifter Files directory provided on the website:

[ftp://ftp.nhgri.nih.gov/pub/NIHUDP/ADAMS\\_METHODS/Example\\_data\\_set/](ftp://ftp.nhgri.nih.gov/pub/NIHUDP/ADAMS_METHODS/Example_data_set/)

**Supp. Methods S3. Procedure for Generating Population Frequency Filter with Galaxy**

1. Use Galaxy website
  - a. <http://main.g2.bx.psu.edu/>
2. Obtain dbSNP data set, using specified options, modified as needed for the project at hand
  - a. Get Data->UCSC Main table browser
  - b. Table Browser Options
    - i. Group:->Variation and Repeats
    - ii. Track:->All SNPs(132)
    - iii. Assembly->Feb. 2009(GRCh37/hg19)
    - iv. Output format: BED – browser extensible data
    - v. Filter: Create
      1. avHet is  $\geq 0.01$
      2. weight = 1 (this will select SNPs that align to a unique position)
      3. valid does include hapmap and by-1000-genomes (not \*)
  - c. Submit
  - d. Get output
3. Send query to Galaxy
4. Lift-Over -> Convert genome coordinates between assemblies and genomes (we need to use this because our data set uses hg18 coordinates)
5. Operate on genomic intervals->Complement intervals of a dataset.
  - a. Check genome wide complement
  - b. Press Execute button
  - c. (This operation creates a “reverse” BED file that *includes* everything that is not a suspect SNP. We make this file to use with VarSifter’s exclude BED file facility)
6. Download BED file

Supp. Table S1. Exome Project Design Considerations

| Design Phase                                                                                                                                                                                                                                                                                                                                                                                                                                                                                                                                                          | Pre-Sequencing Data Collection                                                                                                                                                                                                                                                                                                                                                                                                                                                                                                                                                  | Data Acquisition                                                                                                                                                                                                                                                                                              | Raw Data to Annotated Variant List                                                                                                                                                                                                                                                                                                                                                                                                                                                                                                                                                                       | Variant Filtering and Analysis                                                                                                                                                                                                                                                                                                                                                                                                                                                                                                                                                                       | Variant Inspection, Validation, Reanalysis                                                                                                                                                                                                                                                                                                                                                                                                                                                                           |
|-----------------------------------------------------------------------------------------------------------------------------------------------------------------------------------------------------------------------------------------------------------------------------------------------------------------------------------------------------------------------------------------------------------------------------------------------------------------------------------------------------------------------------------------------------------------------|---------------------------------------------------------------------------------------------------------------------------------------------------------------------------------------------------------------------------------------------------------------------------------------------------------------------------------------------------------------------------------------------------------------------------------------------------------------------------------------------------------------------------------------------------------------------------------|---------------------------------------------------------------------------------------------------------------------------------------------------------------------------------------------------------------------------------------------------------------------------------------------------------------|----------------------------------------------------------------------------------------------------------------------------------------------------------------------------------------------------------------------------------------------------------------------------------------------------------------------------------------------------------------------------------------------------------------------------------------------------------------------------------------------------------------------------------------------------------------------------------------------------------|------------------------------------------------------------------------------------------------------------------------------------------------------------------------------------------------------------------------------------------------------------------------------------------------------------------------------------------------------------------------------------------------------------------------------------------------------------------------------------------------------------------------------------------------------------------------------------------------------|----------------------------------------------------------------------------------------------------------------------------------------------------------------------------------------------------------------------------------------------------------------------------------------------------------------------------------------------------------------------------------------------------------------------------------------------------------------------------------------------------------------------|
| <p><b>Review Evidence For Genetic Etiology</b></p> <p><b>Assess Material</b><br/>Family members tissues/DNA</p> <p><b>Technology</b><br/>Genome/Exome<br/>RNA-seq<br/>Custom capture</p> <p><b>Study Design</b><br/>Single exome<br/>Multiple exome<br/>Multiple family</p> <p><b>Adjunct Procedure</b><br/>SNP array<br/>RNA array analysis</p> <p><b>Data Acquisition</b><br/>Collaborative<br/>Commercial<br/>At your facility</p> <p><b>Analysis Plan</b><br/>Alignment<br/>Base calling<br/>Analysis</p> <p><b>Validation Plan</b><br/>Sanger<br/>Functional</p> | <p><b>Clinical Data</b><br/>Family history<br/>Phenotypes<br/>Penetrance<br/>Consanguinity<br/>Disease freq.<br/>Genetic model</p> <p><b>SNP Array Derived</b><br/>Consanguinity<br/>Mosaicism<br/>Verify family relationships<br/>Dosage variants<br/>Recombination mapping</p> <p><b>Gene Lists</b><br/><i>Inclusion</i><br/>Cellular pathways<br/>Clinical hypotheses<br/>Genes in regions of interest<br/><i>Exclusion</i><br/>Highly variable genes</p> <p><b>BED Files</b><br/>Excluded base-pair list<br/>Segregation regions<br/>Defining other regions of interest</p> | <p><b>Sample Library Preparation</b><br/>Fragmentation<br/>End repair<br/>Adapter ligation<br/>Clonal amplification</p> <p><b>Sequencing</b><br/>Several methods available<br/>Generates a raw data file, e.g. FASTQ file</p> <p><b>Quality Assessment</b><br/>Library complexity<br/>Short read coverage</p> | <p><b>Alignment of Short Reads to a Ref. Sequence</b><br/>Generates an alignment file, e.g. SAM (Sequence Alignment Map) or BAM (Binary Alignment Map)</p> <p><b>Genotype Calling</b><br/>Individual variants<br/>Defined by a genomic position and base-pair (or structural) change</p> <p><b>Annotation</b><br/>Localization within known genes<br/>Amino acid change<br/>Predicted pathogenicity (many other possibilities)</p> <p><b>Quality Assessment</b><br/>Alignment Quality<br/>Genotype Call Quality<br/>Annotation Certainty</p> <p><i>(End product is a list of annotated variants)</i></p> | <p><b>Inclusion/Exclusion by Gene Name</b><br/>Pathway components<br/>Clinical hypotheses<br/>Gene exclusion lists</p> <p><b>Inclusion/Exclusion Regions of Interest</b><br/>Haplo -excess/<br/>-insufficiency<br/>Segregation/linkage intervals<br/>Regions of homozygosity</p> <p><b>Population Frequency</b></p> <p><b>Variant Characteristics</b><br/>Frequent false positives<br/>Segregation consistency</p> <p><b>Genotype Category</b><br/>Homozygous<br/>Heterozygous, etc</p> <p><b>Pathogenicity Ranking</b></p> <p><i>(End product of filtering is a list of candidate variants)</i></p> | <p><b>Sanger Validation</b><br/>Individual genotype calls need to be verified.</p> <p><b>Known Variants/ Genes:</b></p> <p><b>Search for Previously Reported Variants Associated with Known Syndrome(s)</b></p> <p><b>New Variants/ Genes:</b></p> <p><b>Correlation with Clinical Phenotype</b></p> <p><b>Functional Validation</b><br/>Experimental work to verify pathogenicity and phenotype causation</p> <p><b>Iteration</b><br/>Redo analysis/ revisit assumptions if no viable candidate variants remain</p> |

**Supp. Table S2a. Candidate List Filtering for 22 Projects--All Family Data Included**

| Family | Exome Capture | Family Size | Used in Linkage | Affected | Total Variants | Population Frequency | Kill List | HWE   | Linkage | Quality | Homoz. | Cmpnd Het |
|--------|---------------|-------------|-----------------|----------|----------------|----------------------|-----------|-------|---------|---------|--------|-----------|
| 1      | 38MB          | 3           | 3               | 1        | 82030          | 31437                | 27320     | 20688 | 18247   | 8162    | 12     | 5         |
| 2      | 38MB          | 5           | 5               | 2        | 88274          | 38096                | 32518     | 24890 | 3838    | 1157    | 15     | 2         |
| 3      | 38MB          | 3           | 3               | 1        | 90904          | 35793                | 31464     | 24020 | 21099   | 9658    | 10     | 9         |
| 4      | 38MB          | 4           | 4               | 2        | 105648         | 44958                | 39925     | 32422 | 4665    | 2069    | 2      | 5         |
| 5      | 38MB          | 3           | 3               | 1        | 107065         | 46944                | 42052     | 32471 | 27778   | 8686    | 19     | 9         |
| 6      | 38MB          | 5           | 5               | 1        | 110168         | 49019                | 42644     | 33507 | 16226   | 3785    | 3      | 2         |
| 7      | 38MB          | 4           | 4               | 1        | 110974         | 49916                | 43673     | 34211 | 19686   | 5205    | 10     | 2         |
| 8      | 38MB          | 6           | 6               | 2        | 111357         | 50426                | 43571     | 33897 | 1569    | 550     | 9      | 1         |
| 9      | 38MB          | 4           | 4               | 1        | 111656         | 51433                | 45448     | 35173 | 19424   | 7209    | 2      | 4         |
| 10     | 38MB          | 4           | 4               | 2        | 111979         | 51624                | 45217     | 36918 | 6050    | 1785    | 5      | 1         |
| 11     | 38MB          | 4           | 3               | 1        | 112363         | 49048                | 41638     | 31973 | 7212    | 2655    | 5      | 5         |
| 12     | 38MB          | 5           | 5               | 1        | 115479         | 51464                | 44489     | 34035 | 13941   | 4171    | 10     | 3         |
| 13     | 38MB          | 3           | 3               | 1        | 117648         | 53059                | 46754     | 36401 | 31000   | 12362   | 14     | 11        |
| 14     | 38MB          | 4           | 4               | 2        | 118958         | 54979                | 49536     | 38989 | 33061   | 11193   | 6      | 3         |
| 15     | 38MB          | 4           | 4               | 1        | 121066         | 51996                | 45362     | 34976 | 17223   | 6413    | 5      | 0         |
| 16     | 38MB          | 5           | 4               | 1        | 133555         | 63478                | 56048     | 44285 | 31287   | 8592    | 17     | 12        |
| 17     | 38MB          | 6           | 6               | 2        | 134633         | 59631                | 51628     | 40883 | 4576    | 1510    | 1      | 0         |
| 18     | 50MB          | 4           | 4               | 1        | 187489         | 86594                | 74172     | 61738 | 42290   | 16062   | 13     | 12        |
| 19     | 50MB          | 3           | 3               | 1        | 190482         | 87781                | 75921     | 63537 | 26627   | 11327   | 8      | 7         |
| 20     | 50MB          | 5           | 5               | 1        | 197529         | 94695                | 82459     | 69143 | 29802   | 9554    | 12     | 14        |
| 21     | 50MB          | 5           | 5               | 1        | 200111         | 96418                | 83851     | 70381 | 34692   | 10435   | 20     | 7         |
| 22     | 50MB          | 4           | 4               | 1        | 219631         | 107441               | 94388     | 80632 | 50753   | 19589   | 11     | 15        |

**Supp Table S2b. Candidate List Filtering for 22 Projects--Only Probands Included**

| Proband | Exome Capture | Family Size | Used in Linkage | Affected | Total Variants | Population Frequency | Kill List | HWE   | Linkage | Quality | Homoz. | Heteroz. | >1 Het genes |
|---------|---------------|-------------|-----------------|----------|----------------|----------------------|-----------|-------|---------|---------|--------|----------|--------------|
| 1       | 38MB          | NA          | NA              | NA       | 20916          | 20073                | 17643     | 12702 | NA      | 11347   | 170    | 87       | 53           |
| 2       | 38MB          | NA          | NA              | NA       | 45708          | 16809                | 13817     | 9760  | NA      | 8759    | 229    | 94       | 60           |
| 3       | 38MB          | NA          | NA              | NA       | 46849          | 17993                | 15033     | 11443 | NA      | 10720   | 191    | 144      | 64           |
| 4       | 38MB          | NA          | NA              | NA       | 51632          | 18980                | 16454     | 11637 | NA      | 10414   | 186    | 93       | 50           |
| 5       | 38MB          | NA          | NA              | NA       | 59699          | 22039                | 18525     | 13496 | NA      | 12335   | 298    | 113      | 77           |
| 6       | 38MB          | NA          | NA              | NA       | 60375          | 23149                | 19121     | 13924 | NA      | 12640   | 253    | 194      | 78           |
| 7       | 38MB          | NA          | NA              | NA       | 62131          | 23181                | 19571     | 14016 | NA      | 12732   | 204    | 107      | 64           |
| 8       | 38MB          | NA          | NA              | NA       | 62558          | 24683                | 22027     | 17448 | NA      | 16225   | 185    | 225      | 133          |
| 9       | 38MB          | NA          | NA              | NA       | 64287          | 25417                | 21872     | 15812 | NA      | 14377   | 233    | 193      | 93           |
| 10      | 38MB          | NA          | NA              | NA       | 69390          | 28582                | 24390     | 18631 | NA      | 17380   | 259    | 233      | 98           |
| 11      | 38MB          | NA          | NA              | NA       | 70438          | 30165                | 27141     | 20452 | NA      | 18827   | 276    | 157      | 94           |
| 12      | 38MB          | NA          | NA              | NA       | 73241          | 31810                | 28544     | 21299 | NA      | 19615   | 265    | 155      | 69           |
| 13      | 38MB          | NA          | NA              | NA       | 78343          | 34167                | 29960     | 22516 | NA      | 20824   | 236    | 138      | 85           |
| 14      | 38MB          | NA          | NA              | NA       | 79882          | 33459                | 28857     | 20847 | NA      | 12654   | 218    | 149      | 72           |
| 15      | 38MB          | NA          | NA              | NA       | 85734          | 39520                | 34868     | 28296 | NA      | 17128   | 351    | 508      | 98           |
| 16      | 38MB          | NA          | NA              | NA       | 91487          | 41883                | 36979     | 28288 | NA      | 23315   | 287    | 180      | 98           |
| 17      | 38MB          | NA          | NA              | NA       | 94444          | 44973                | 39788     | 29872 | NA      | 15018   | 283    | 115      | 66           |
| 18      | 50MB          | NA          | NA              | NA       | 113398         | 49068                | 41770     | 32529 | NA      | 28440   | 364    | 231      | 124          |
| 19      | 50MB          | NA          | NA              | NA       | 115455         | 52089                | 45073     | 36201 | NA      | 32740   | 319    | 267      | 115          |
| 20      | 50MB          | NA          | NA              | NA       | 118437         | 50535                | 42891     | 33900 | NA      | 29767   | 356    | 233      | 113          |
| 21      | 50MB          | NA          | NA              | NA       | 123628         | 55479                | 47438     | 37908 | NA      | 34169   | 363    | 237      | 109          |
| 22      | 50MB          | NA          | NA              | NA       | 124535         | 56476                | 49089     | 39868 | NA      | 36604   | 318    | 396      | 174          |



**Supp. Table S2 Legend: Cumulative Candidate List Filtering Results, Families Versus Probands-Only**

Supp. Table S2a lists filtering data that includes both SNP array and exome data from selected nuclear family members. Supp. Table S2b shows the same projects, with only exome proband data included. The last two data points (“Heterozygotes” and “Homozygotes”) are not cumulative, but represent separate application of heterozygote-only, and homozygote-only filters. Note that the implementation of homozygote and heterozygote filters differs between single exome analyses and family based analyses. Mendelian segregation and phase information is not available in the case of single exome analysis. Heterozygotes are not checked for inheritance from both parents. The “heterozygote” count is a tabulation of all pair-wise combinations of variants for those cases where more than one heterozygous variant is found in the same gene. Single exome projects start with fewer variants and end with a larger number of candidates for further study. See the text for a further explanation of the various filtration steps.

The table column labels are as follows:

- Family: A set of twenty-two separated families are listed and numbered. The numbers between Supp. Tables S2a and S2b are the same.
- Exome Capture: The Aligent SureSelect kit (38 Mb or 50 Mb) that was used to sequence the family.
- Family Size: The number of individuals in the family.
- Used in Linkage: The number of family members for whom SNP arrays were used to map recombinations.
- Affected: The number of affected family members. In these examples only children were affected.
- Total Variants: The total number of variants generated by the data acquisition (capture, flow cell and genotyping) phase of the exome project.
- Population Frequency: The number of variants left after filtering by population frequency (1% threshold, 1000 genomes and HapMap variants only).
- Kill List: The number of variants remaining after filtering the value from the previous column using our gene exclusion list.
- HWE: The number of variants remaining after filtering the value from the previous column using our base pair exclusion list. The notation HWE (for Hardy Weinberg Equilibrium) is used as the base pair exclusion list comprises variants detected due to being out of HWE (see text).
- Linkage: The number of variants remaining after filtering the value from the previous column using a BED-formatted “include” file of regions that segregated according an autosomal recessive model of inheritance and with the phenotypes assigned to the family by clinical evaluation.

- Quality: The number of variants remaining after filtering the value from the previous column using a filter that demanded that each family member have high quality genotypes (MPG  $\geq 10$  and MPG/coverage  $\geq 0.5$ ).
- Homoz.: The number of variants remaining after filtering the value from the Quality column, demanding that the variant be a homozygous non-reference in the affected individuals AND the involved variants segregated in a Mendelian-consistent manner.
- Cmpnd Het: The number of variants remaining after filtering the value from the Quality column, demanding that paired variants were consistent with heterozygous inheritance AND involved variants that segregated in a Mendelian-consistent manner.
